# Supplementary material for: Inferring cellular regulatory networks with Bayesian model averaging for linear regression (BMALR)
Source: Royal Society of Chemistry journal article supplement (doi:10.1039/c4mb00053f), 2014-05-28
Supplement: c4mb00053f1.pdf [file c4mb00053f1.pdf]

Supplementary Information

## Inferring cellular regulatory networks with Bayesian Model Averaging for Linear Regression (BMALR)

Xun Huang<sup>a</sup> and Zhike Zi<sup>a,b\*</sup>

<sup>a</sup>BIOSS Centre for Biological Signalling Studies, University of Freiburg, 79104, Freiburg, Germany.

<sup>b</sup>Present address: Max Planck Institute for Molecular Genetics, 14195 Berlin, Germany

\*Corresponding author, E-mail: zhike.zi@molgen.mpg.de

This Supplementary Information contains the supplementary text for the derivation of Equation 6 in the main text, other technical details for calculating probability density of the data, as well as Supplementary Figures.

### 1. The derivation of probability density in Gaussian Bayesian network

Given a Gaussian Bayesian network, we can uniquely generate a multivariate (nonsingular) normal distribution and vice versa<sup>1,2</sup>. Suppose we have an  $n$ -dimensional random vector ( $X$ ), which follows a multivariate normal distribution:

$$\rho(X|u,r) = N(X;u,r^{-1}) \quad (\text{S1})$$

where the parameter  $u$  is the mean vector of this distribution, and the parameter  $r$  is the inverse covariance matrix of this distribution. To make the model decomposable, the global parameter independence and parameter modularity should be satisfied<sup>1,3</sup>. Therefore, the parameter  $u$  is assumed to follow a multivariate normal distribution, and the parameter  $r$  is assumed to follow a Wishart distribution<sup>1</sup>. Then, the prior distributions of  $u$  and  $r$  are given below:

$$\rho(u|r) = N(u;\mu,(v \cdot r)^{-1}) \quad (\text{S2})$$

$$\rho(r) = \text{Wishart}(r;\alpha,\beta) \quad (\text{S3})$$

where the hyperparameter  $\mu$  is the mean vector of the distribution of  $u$ . The hyperparameter  $v$  is a positive number. The hyperparameter  $\alpha$  is the degree of freedom of the Wishart distribution, and  $\alpha$  should be greater than  $(n-1)$ . The hyperparameter  $\beta$  is an  $n$ -by- $n$  scale matrix, and should be positive-definite.

If a dataset  $D$  is generated by the random vector  $X$ , which satisfies the distribution mentioned above, there is a close-formed expression of  $\rho(D_W)$  that is the probability density of the data restricted to the subset  $W$  of the variables in  $X$ . In addition, we use the parameter  $M$  to stand for the sample size of  $D$ ,  $l_W$  for the number of elements in  $W$ . Then, the probability density of  $D_W$  will satisfy the following equation<sup>1,2</sup>:

$$\rho(D_W) = \left(\frac{1}{2\pi}\right)^{\frac{M l_W}{2}} \left(\frac{v}{v+M}\right)^{\frac{l_W}{2}} \left(\frac{c(l_W, \alpha_W)}{c(l_W, \alpha_W + M)}\right) \left(\frac{|\beta_W|^{\frac{\alpha_W}{2}}}{|\beta_W^*|^{\frac{\alpha_W + M}{2}}}\right) \quad (\text{S4})$$

where

$$c(n, \alpha) = \left[2^{n\alpha/2} \pi^{n(n-1)/4} \prod_{i=1}^n \Gamma\left(\frac{\alpha+1-i}{2}\right)\right]^{-1} \quad (\text{S5})$$

$$\beta_W = \left((\beta^{-1})^{(W)}\right)^{-1} \quad (\text{S6})$$

$$\beta_w^* = \beta_w + s_w + \left(\frac{vM}{v+M}\right)(\bar{X}_w - \mu^{(W)})(\bar{X}_w - \mu^{(W)})^T \quad (S7)$$

$$s_w = \sum_{i=1}^M (X_w[i] - \bar{X}_w)(X_w[i] - \bar{X}_w)^T \quad (S8)$$

$$\alpha_w = \alpha - n + l_w \quad (S9)$$

## 2. Default parameter settings for probability density in Gaussian Bayesian network

To calculate the probability density of data  $\rho(D_W)$  with the Equation S5 listed above, we need to specify four parameters  $\mu$ ,  $v$ ,  $\alpha$ , and  $\beta$ , which are the hyperparameters shown in Equation S3 and Equation S4. The parameter  $\mu$  is the mean vector of the parameter  $u$  in Equation S2. In BMALR, we use the mean vector of the real sample ( $\bar{X}$ ) as the default value for the parameter  $\mu$ . The parameter  $v$  is the size of the hypothetical sample upon which we base our prior belief concerning the value of  $u$ <sup>1,2</sup>. Therefore, we use the sample size  $M$  as the default value for the parameter  $v$ . The parameter  $\alpha$  can be regarded as the effective sample size for determining the parameter  $r$  in Equation S2, and it should be greater than  $(n-1)$ <sup>1,2</sup>. In BMALR, we use  $n$  as the default value for parameter  $\alpha$ . The parameter  $\beta$  can be regarded as covariance matrix in the hypothetical sample upon which we based on our prior belief of  $u$ . It is an  $n$ -by- $n$  positive definite matrix. We assume the prior probability of all the edges is uniformly distributed for simplification. With such flat prior,  $\beta$  will be a diagonal matrix. Therefore, we set the default value of  $\beta$  as  $H$ , where  $H$  is the diagonal matrix of the covariance matrix of the sample data.

In summary, the parameter settings for calculating probability density of the data,  $\rho(D_W)$ , is listed as below:

$$\mu = \bar{X} \quad (S10)$$

$$v = M \quad (S11)$$

$$\alpha = n \quad (S12)$$

$$\beta = H \quad (S13)$$

where  $H$  is a  $n$ -by- $n$  diagonal matrix, and  $H(i,i) = \text{variance}(X_i)$ , for  $i = 1, 2, \dots, n$ .

With the default parameter settings in Equation S10-S13, Equation S4 can reformate as below:

$$\rho(D_W) = \left(\frac{1}{2\pi}\right)^{\frac{M-l_w}{2}} \left(\frac{1}{2}\right)^{\frac{l_w}{2}} \left(\frac{c(l_w, l_w)}{c(l_w, l_w + M)}\right) \left(\frac{|H^{(W)}|^{\frac{M}{2}}}{|E^{(W)} + M \cdot R^{(W)}|^{\frac{l_w+M}{2}}}\right) \quad (S14)$$

where  $E^{(W)}$  is a  $l_w$ -by- $l_w$  identity matrix.

The likelihood that the local structure  $G_{Pa}$  generates the data  $D_{Pa, Xi}$ ,  $P(D_{Pa, Xi} | G_{Pa})$  can be rewritten as:

$$\begin{aligned} P(D_{Pa, Xi} | G_{Pa}) &= \frac{\rho(D_{Pa, Xi})}{\rho(D_{Pa})} \\ &= \left(\frac{1}{2\pi}\right)^{\frac{M(l_{Pa, Xi} - l_{Pa})}{2}} \left(\frac{1}{2}\right)^{\frac{l_{Pa, Xi} - l_{Pa}}{2}} \left(\frac{c(l_{Pa, Xi}, l_{Pa, Xi})c(l_{Pa}, l_{Pa} + M)}{c(l_{Pa}, l_{Pa})c(l_{Pa, Xi}, l_{Pa, Xi} + M)}\right) \left(\frac{|H^{(Pa)}|^{\frac{M}{2}} |E^{(Pa)} + M \cdot R^{(Pa)}|^{\frac{l_{Pa}+M}{2}}}{|H^{(Pa, Xi)}|^{\frac{M}{2}} |E^{(Pa, Xi)} + M \cdot R^{(Pa, Xi)}|^{\frac{l_{Pa, Xi}+M}{2}}}\right) \\ &= \left(\frac{1}{2\pi}\right)^{\frac{M}{2}} \left(\frac{1}{2}\right)^{\frac{1}{2}} \left(\frac{c(l_{Pa, Xi}, l_{Pa, Xi})c(l_{Pa}, l_{Pa} + M)}{c(l_{Pa}, l_{Pa})c(l_{Pa, Xi}, l_{Pa, Xi} + M)}\right) \left(\frac{|E^{(Pa)} + M \cdot R^{(Pa)}|^{\frac{l_{Pa}+M}{2}}}{|H^{(Xi)}|^{\frac{M}{2}} |E^{(Pa, Xi)} + M \cdot R^{(Pa, Xi)}|^{\frac{l_{Pa, Xi}+M}{2}}}\right) \end{aligned} \quad (S15)$$

To further increase the efficiency, we make an approximation:  $\frac{c(l_{Pa, Xi}, l_{Pa, Xi})c(l_{Pa}, l_{Pa} + M)}{c(l_{Pa}, l_{Pa})c(l_{Pa, Xi}, l_{Pa, Xi} + M)} \approx 1$ , therefore,

$$P(D_{Pa, Xi} | G_{Pa}) \approx \left(\frac{1}{2\pi}\right)^{\frac{M}{2}} \left(\frac{1}{2}\right)^{\frac{1}{2}} (H^{(Xi)})^{-\frac{M}{2}} \left(\frac{|E^{(Pa)} + M \cdot R^{(Pa)}|^{\frac{l_{Pa}+M}{2}}}{|E^{(Pa, Xi)} + M \cdot R^{(Pa, Xi)}|^{\frac{l_{Pa, Xi}+M}{2}}}\right) \quad (S16)$$

The posterior probability of an edge feature  $f$  is computed with

$$\begin{aligned}
 P(f | D) &\approx \sum_{Pa \in S_i} f(G_{Pa}) P(G_{Pa} | D_{Pa, X_i}) \\
 &= \frac{\sum_{Pa \in S_i} f(G_{Pa}) P(D_{Pa, X_i} | G_{Pa}) P(G_{Pa})}{\sum_{Pa \in S_i} P(D_{Pa, X_i} | G_{Pa}) P(G_{Pa})}
 \end{aligned} \tag{S17}$$

It is worth noting that replacing  $P(D_{Pa, X_i} | G_{Pa})$  in equation S17 with equation S16 leads to the cancellation of the item

$\left(\frac{1}{2\pi}\right)^{\frac{M}{2}} \left(\frac{1}{2}\right)^{\frac{1}{2}} (H^{(X_i)})^{-\frac{M}{2}}$ . Therefore, the item  $\left(\frac{1}{2\pi}\right)^{\frac{M}{2}} \left(\frac{1}{2}\right)^{\frac{1}{2}} (H^{(X_i)})^{-\frac{M}{2}}$  can be ignored in the implementation of the algorithm.

Therefore, we made the following simplification for calculating  $\rho(D_W)$ :

$$\begin{aligned}
 \rho(D_W) &\propto \left(\frac{1}{2\pi}\right)^{\frac{M \cdot l_W}{2}} \left(\frac{1}{2}\right)^{\frac{l_W}{2}} \left( \frac{|H^{(W)}|^{\frac{M}{2}}}{|E^{(W)} + M \cdot R^{(W)}|^{\frac{l_W + M}{2}}} \right) \\
 &\propto |E^{(W)} + M \cdot R^{(W)}|^{\frac{-l_W - M}{2}}
 \end{aligned} \tag{S18}$$

We noticed that when the parameter  $M$  is too large (e.g.  $> 100$ ), loss of precision often appears in the calculation of equation S18. In practice, one can set  $M$  with a value between 20 and 100 to avoid this problem and get an approximate value for equation S18 in case that the sample size is too large. In BMALR, we set  $M = 50$ .

### 3. References

1. D. Geiger and D. Heckerman, *Ann Stat*, 2002, 30, 1412-1440.
2. R. E. Neapolitan, *Learning bayesian networks*, Pearson Prentice Hall Upper Saddle River, 2004.
3. D. Pe'er, *Sci STKE*, 2005, 2005, pl4.

## 4. Supplementary Figures

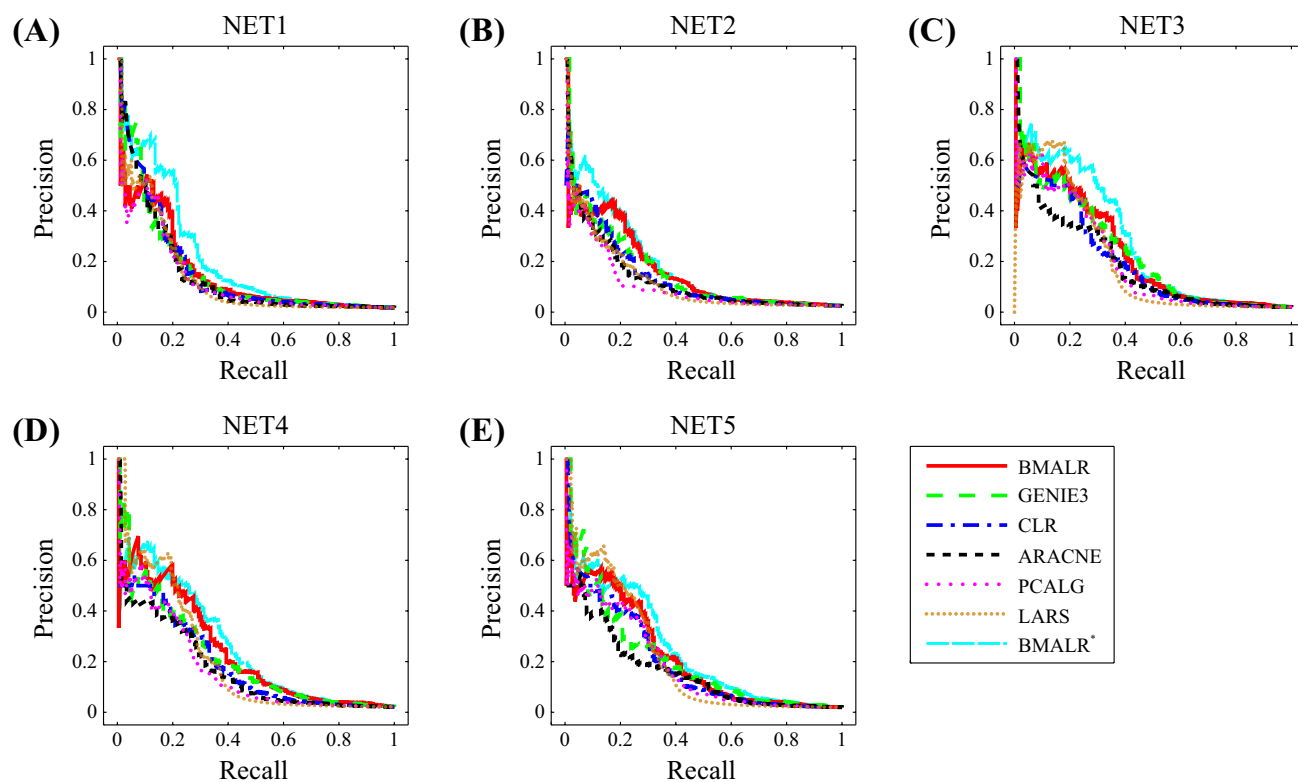

**Supplementary Figure 1** PR curves for DREAM4 *in silico* Size100 Multifactorial Challenge. BMALR\* denotes the results of BMALR with the log transformation of the datasets. (A) For gold standard network 1 (NET1). (B) For gold standard network 2 (NET2). (C) For gold standard network 3 (NET3). (D) For gold standard network 4 (NET4). (E) For gold standard network 5 (NET5).

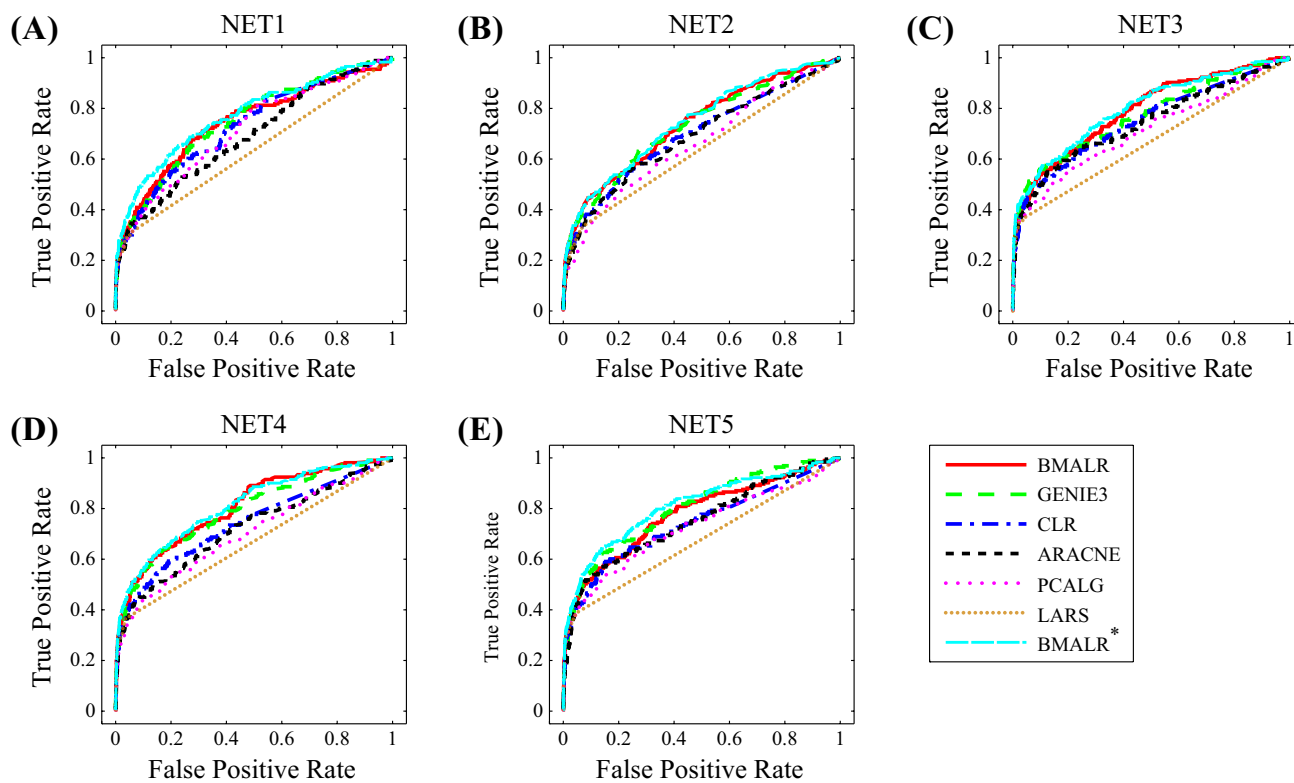

**Supplementary Figure 2** ROC curves for DREAM4 *in silico* Size100 Multifactorial Challenge. BMALR\* denotes the results of BMALR with the log transformation of the datasets. (A) For gold standard network 1 (NET1). (B) For gold standard network 2 (NET2). (C) For gold standard network 3 (NET3). (D) For gold standard network 4 (NET4). (E) For gold standard network 5 (NET5).



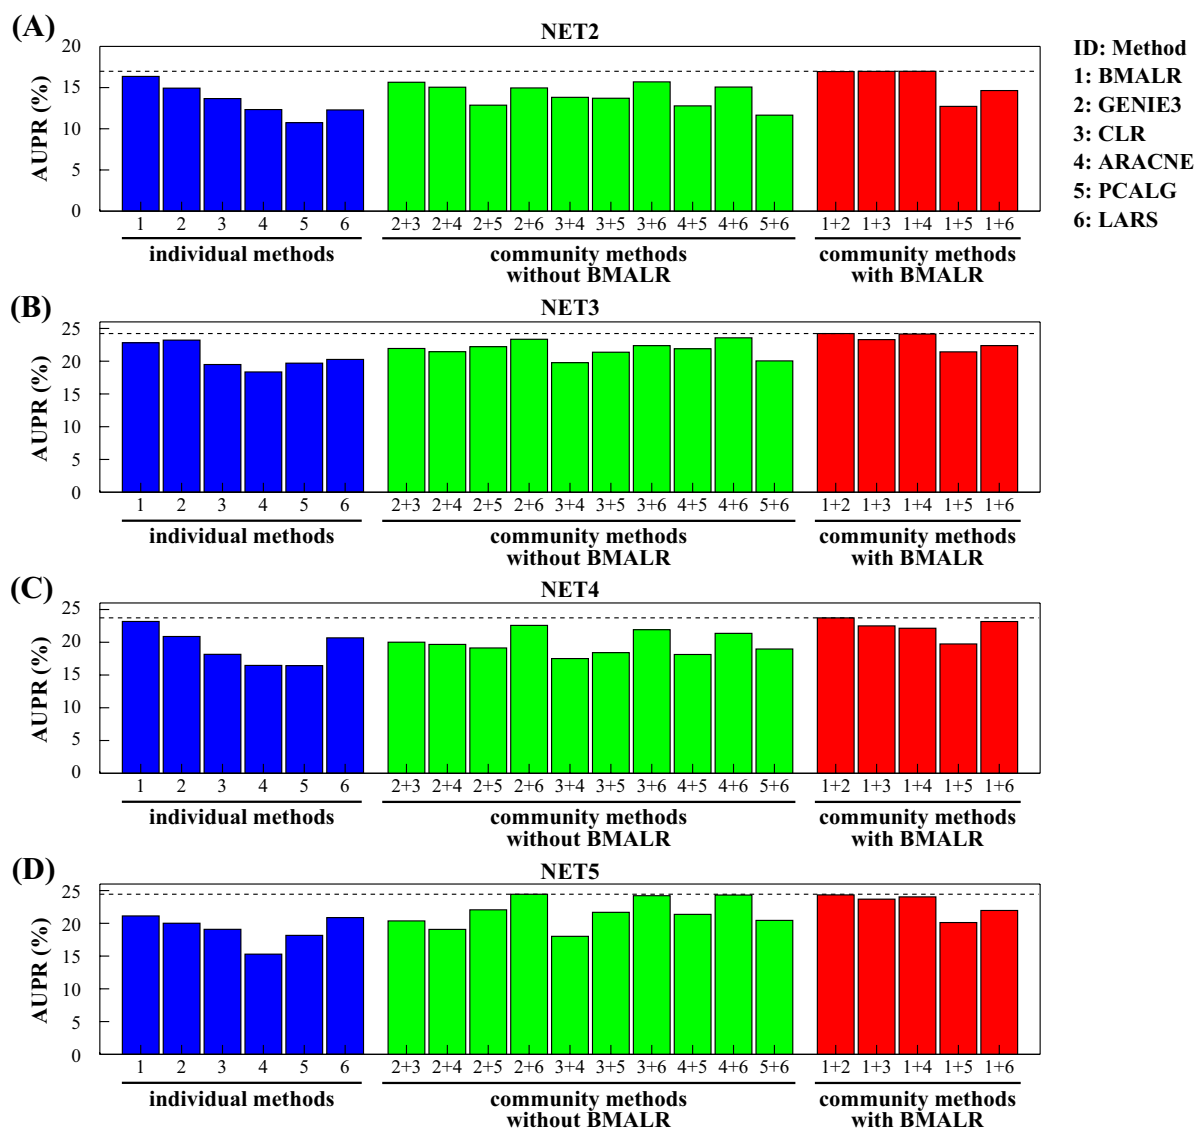

**Supplementary Figure 4** The performance (area under precision-recall curve, AUPR) of individual methods and community methods with combinations of every two individual methods on DREAM4 *in silico* size 100 multifactorial sub-challenge. (A) For gold standard network 2 (NET2). (B) For gold standard network 3 (NET3). (C) For gold standard network 4 (NET4). (D) For gold standard network 5 (NET5). The dashed horizontal line denotes the highest performance level in all the methods.

## Supplementary Tables

**Supplementary Table 1** The influence of *maxFanIn* on the performance of BMALR in DREAM4 *in silico* size 100 multifactorial sub-challenge.

| <i>MaxFanIn</i> | NET1  |       | NET2  |       | NET3  |       | NET4  |       | NET5  |       | Score | Time (second) |
|-----------------|-------|-------|-------|-------|-------|-------|-------|-------|-------|-------|-------|---------------|
|                 | AUPR  | AUROC |       |               |
| 2               | 0.155 | 0.745 | 0.166 | 0.737 | 0.231 | 0.792 | 0.234 | 0.808 | 0.214 | 0.778 | 39.4  | 1.8E+00       |
| 3               | 0.151 | 0.742 | 0.163 | 0.735 | 0.232 | 0.798 | 0.231 | 0.806 | 0.214 | 0.790 | 39.4  | 5.7E+01       |
| 4               | 0.148 | 0.743 | 0.159 | 0.732 | 0.230 | 0.791 | 0.227 | 0.796 | 0.212 | 0.793 | 38.6  | 1.8E+03       |

**Supplementary Table 2** The influence of *maxFanIn* on the performance of BMALR in DREAM5 network inference sub-challenge with *in silico* datasets.

| <i>maxFanIn</i> | AUPR  | AUROC | Optimal <i>F</i> -score | Time (second) |
|-----------------|-------|-------|-------------------------|---------------|
| 2               | 0.320 | 0.809 | 0.372                   | 1.3E+02       |
| 3               | 0.321 | 0.809 | 0.374                   | 8.3E+03       |

**Supplementary Table 3** The influence of *maxFanIn* on the performance of BMALR in the benchmark of the T-cell signaling network.

| Method | AUPR  | AUROC | Optimal <i>F</i> -score | <i>p</i> -value of Fisher's exact test | Time (second) |
|--------|-------|-------|-------------------------|----------------------------------------|---------------|
| 2      | 0.343 | 0.720 | 0.500                   | 2.70E-04                               | 1.3E-01       |
| 3      | 0.345 | 0.726 | 0.500                   | 2.70E-04                               | 1.4E-01       |
| 4      | 0.337 | 0.709 | 0.465                   | 9.44E-04                               | 1.6E-01       |
| 5      | 0.338 | 0.709 | 0.462                   | 9.44E-04                               | 2.0E-01       |
| 6      | 0.338 | 0.709 | 0.462                   | 9.44E-04                               | 2.2E-01       |
| 7      | 0.338 | 0.709 | 0.462                   | 9.44E-04                               | 2.4E-01       |
